# Supplementary material
Source: PubMed Central journal article supplement (PMC11028307)
Supplement: 262_2017_2106_MOESM1_ESM.pdf [file 262_2017_2106_MOESM1_ESM.pdf]

**Supplementary Table 1. Multivariate Cox regression analysis of IL-6/IL-10 expression adjusted to other prognostic factors.**

| Variables           | DFS (IL-6) |             |              | BCSS (IL-6) |             |                  | DFS (IL-10) |             |                  |
|---------------------|------------|-------------|--------------|-------------|-------------|------------------|-------------|-------------|------------------|
|                     | HR         | 95.0% CI    | p-value      | HR          | 95.0% CI    | p-value          | HR          | 95.0% CI    | p-value          |
| <b>IL</b>           | 0.788      | 0.603-1.029 | 0.08         | 0.852       | 0.627-1.157 | 0.305            | 0.799       | 0.543-1.175 | 0.254            |
| <b>Age</b>          | 0.864      | 0.588-1.271 | 0.459        | 1.206       | 0.789-1.878 | 0.397            | 0.673       | 0.436-1.037 | 0.073            |
| <b>Tumour size</b>  | 1.155      | 1.007-1.325 | <b>0.039</b> | 1.13        | 0.941-1.148 | 0.479            | 1.344       | 0.956-1.890 | 0.089            |
| <b>Tumour stage</b> | 2.862      | 2.039-4.017 | <b>0.001</b> | 2.785       | 1.897-3.795 | <b>&lt;0.001</b> | 2.661       | 1.765-4.012 | <b>&lt;0.001</b> |
| <b>Tumour grade</b> | 1.294      | 0.984-1.701 | 0.065        | 1.635       | 1.169-2.209 | <b>0.004</b>     | 1.097       | 0.789-1.524 | 0.581            |
| <b>NPI</b>          | 0.76       | 0.516-1.120 | 0.165        | 1.023       | 0.713-1.611 | 0.925            | 1.022       | 0.624-1.674 | 0.932            |
| <b>ER (-/+)</b>     | 1.305      | 0.896-1.900 | 0.165        | 1.782       | 1.221-2.646 | <b>0.003</b>     | 1.329       | 0.845-2.090 | 0.219            |
| <b>PgR (-/+)</b>    | 0.869      | 0.635-1.190 | 0.382        | 0.592       | 0.420-0.817 | <b>0.002</b>     | 1.048       | 0.714-1.538 | 0.811            |
| <b>HER-2 (-/+)</b>  | 1.205      | 0.858-1.692 | 0.281        | 1.452       | 1.021-2.073 | <b>0.039</b>     | 1.683       | 1.157-2.448 | <b>0.006</b>     |
| <b>LVI (-/+)</b>    | 1.491      | 1.172-1.898 | <b>0.001</b> | 1.493       | 1.137-1.940 | <b>0.003</b>     | 1.762       | 1.344-2.311 | <b>&lt;0.001</b> |
| <b>LN status</b>    | 0.547      | 0.363-0.822 | <b>0.004</b> | 0.671       | 0.433-1.040 | 0.074            | 0.439       | 0.270-0.714 | <b>0.001</b>     |

Abbreviation: HR, hazard ratio; CI, confidence interval; NPI is Nottingham Prognostic Index; ER, oestrogen receptor; PgR, progesterone receptor; HER-2, epidermal growth factor receptor 2; LVI, lymphovascular invasion; LN, lymph node.

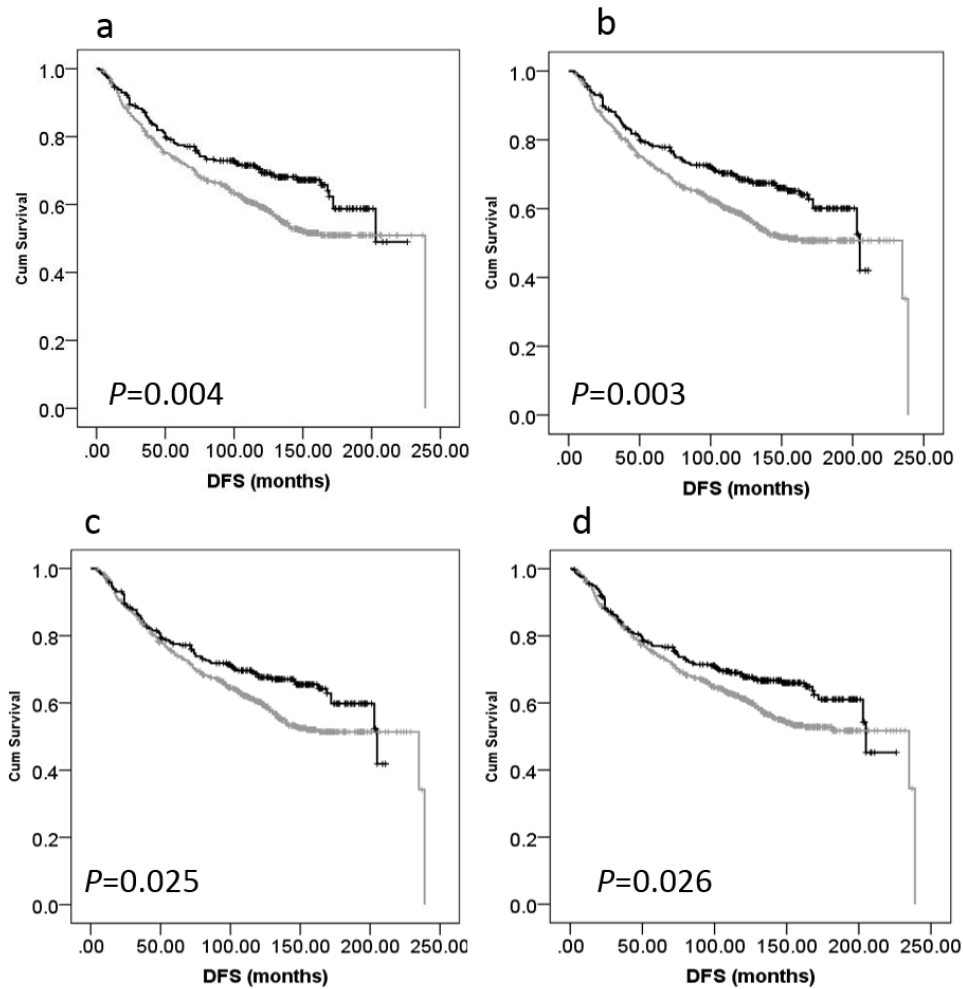

**Supplementary Figure 1. Kaplan-Meier analyses of associations of IL-6 expression with disease-free survival in phenotypic subgroups.** High IL-6 expression was significantly associated with disease-free survival in: (a) non-basal ( $P=0.004$ ), (b) non-triple negative ( $P=0.003$ ), (c) ER positive ( $P=0.025$ ), and (d) HER-2 negative ( $P=0.026$ ) patient subgroups. Significance was determined using the log-rank test. Black represents high expression and grey represents low expression of the cytokine

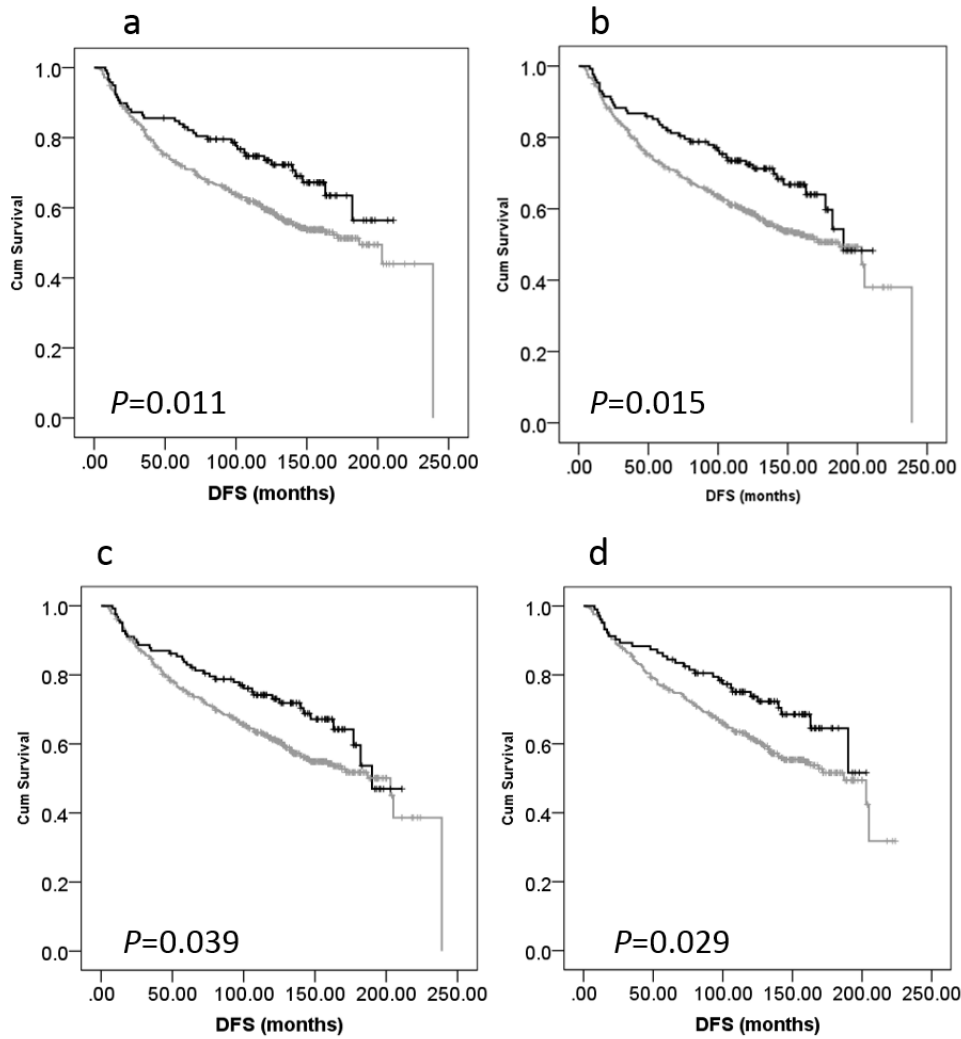

**Supplementary Figure 2. Kaplan-Meier analyses of associations of IL-10 expression with disease-free survival in phenotypic subgroups.** High IL-10 expression was significantly associated with disease-free survival in (a) non-basal ( $P=0.011$ ), (b) non-triple negative ( $P=0.015$ ), (c) ER positive ( $P=0.039$ ), and (d) PgR positive ( $P=0.029$ ) patient subgroups. Significance was determined using the log-rank test. Black represents high expression and grey represents low expression of the cytokine

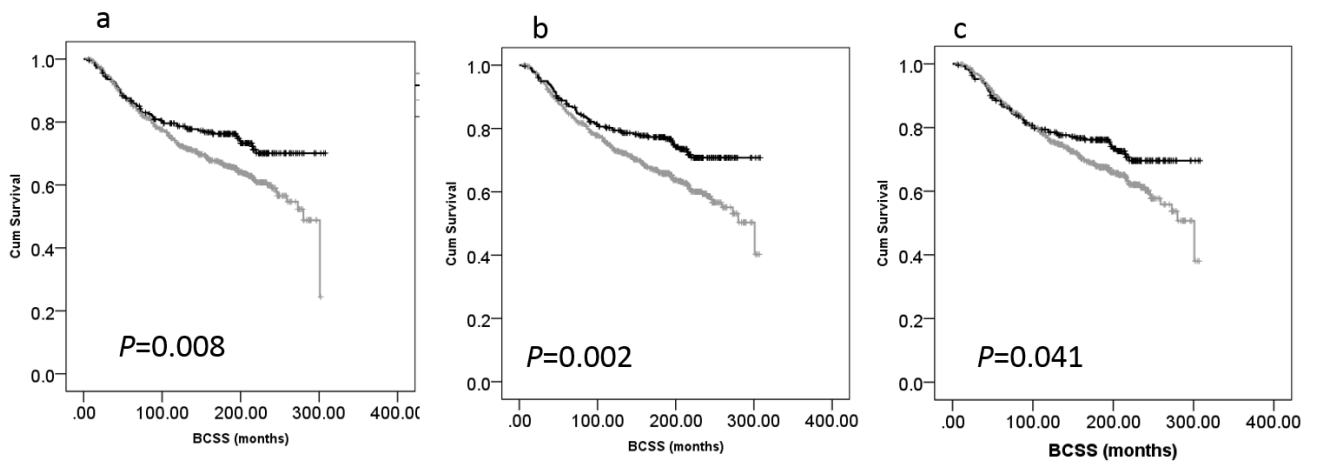

**Supplementary Figure 3. BCSS of IL-6 in disease subgroups.** Kaplan-Meier BCSS analysis showing the impact of IL-6 in phenotypic subgroups with significance determined using the log-rank test. High IL-6 expression was significantly associated with BCSS in: (a) non-basal-like ( $P=0.008$ ), (b) non triple negative ( $P =0.002$ ), and (c) ER positive ( $P =0.041$ ) patient subgroups. Black represents high expression and grey represents low expression of the cytokine
